# Supplementary material for: Effect of procyanidins on lipid metabolism and inflammation in rats exposed to alcohol and iron
Source: PubMed Central journal article supplement — Heliyon. 2020 Sep 7;6(9):e04847. doi: 10.1016/j.heliyon.2020.e04847 (PMC7490533; doi:10.1016/j.heliyon.2020.e04847), 2020-09-07
Supplement: mmc1.pdf [file mmc1.pdf]

**Supplementary Figure 2 Western Blots**

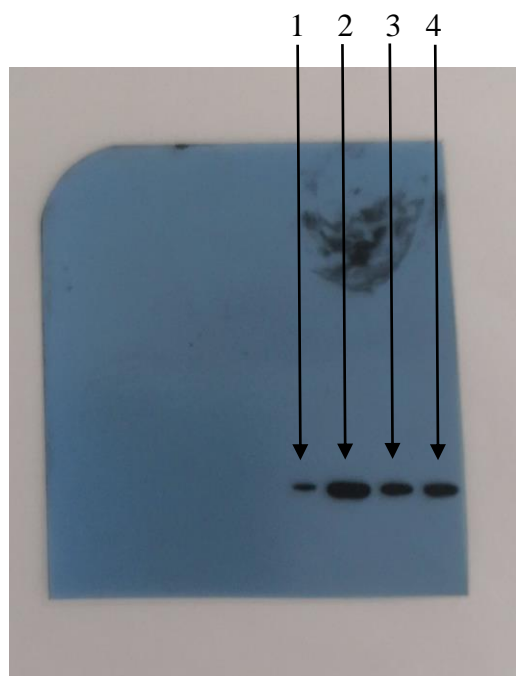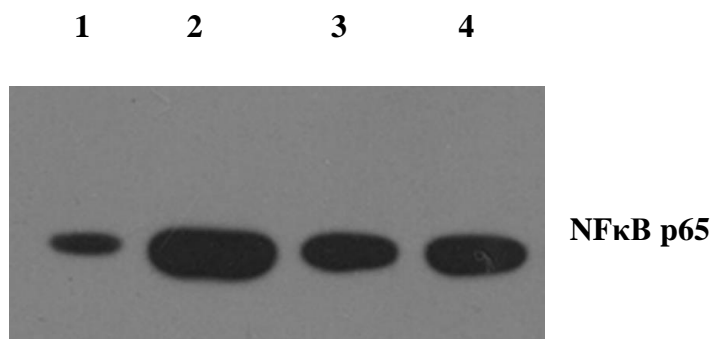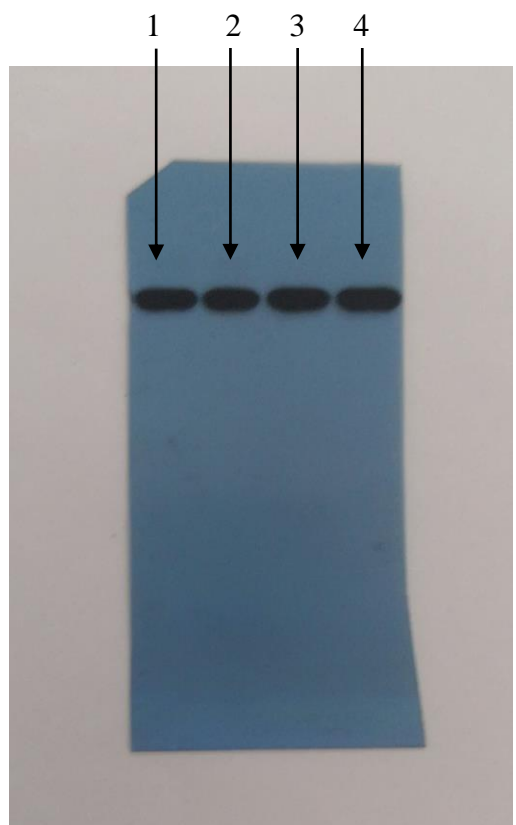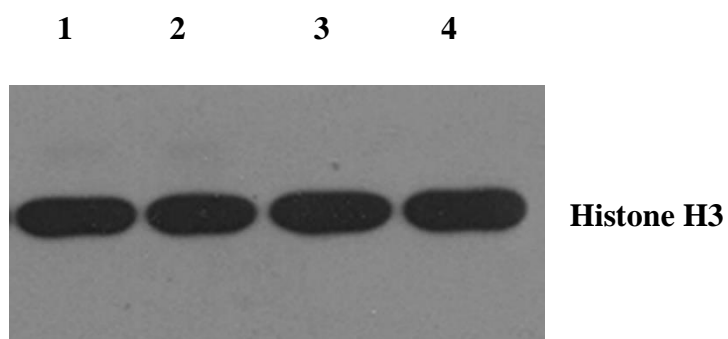

**Supplementary Figure 2 Western Blots**

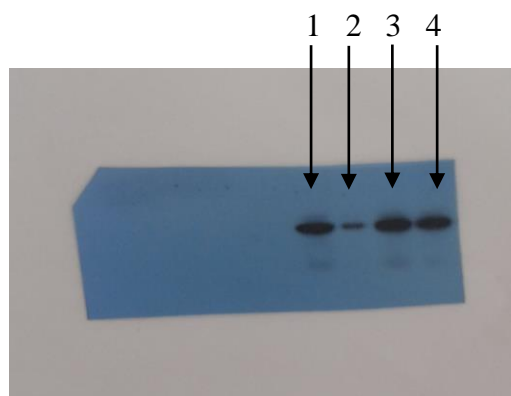

**IκB**

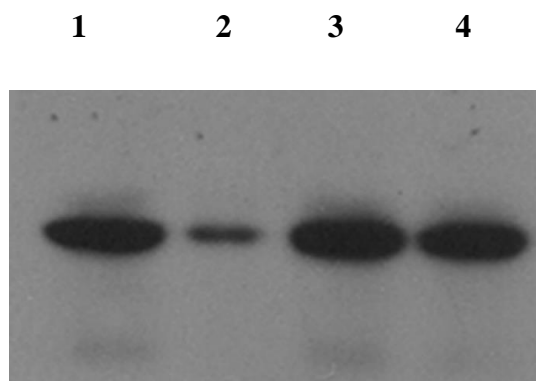

**IκB**

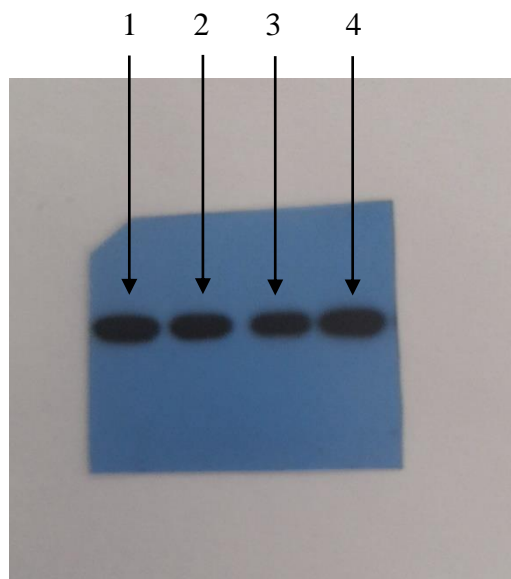

**β-actin**

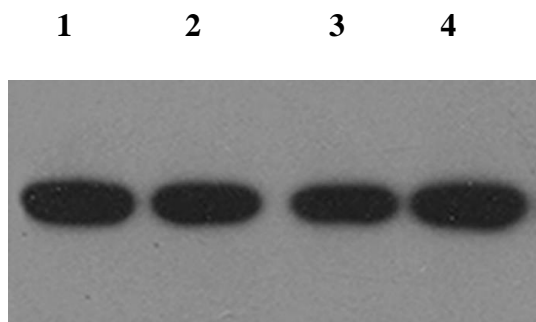

**β-actin**
